# Supplementary material for: Evolutionary Characteristics and Immunologic Divergence of Lung and Brain Metastasis Lesions in NSCLC
Source: PubMed Central journal article supplement — Mol Cancer Res. 2022 Dec 19;21(4):374–85. doi: 10.1158/1541-7786.MCR-22-0474 (PMC10068444; doi:10.1158/1541-7786.mcr-22-0474), 2022-12-19
Supplement: mcr-22-0474_table_s1_suppst1.pdf [file mcr-22-0474_table_s1_suppst1.pdf]

**Table S1** The basic clinical information of all patients.

| Patient ID | Group            | Histology | Gender | Age | Smoking status |
|------------|------------------|-----------|--------|-----|----------------|
| P1_Tb      | Brain metastasis | LUAD      | Male   | 60  | No smoking     |
| P1_Tl      | Lung tumor       | LUAD      | Male   | 60  | No smoking     |
| P2_Tb      | Brain metastasis | LUAD      | Female | 58  | No smoking     |
| P2_Tl      | Lung tumor       | LUAD      | Female | 58  | No smoking     |
| P3_Tb      | Brain metastasis | LNET      | Male   | 55  | Smoking        |
| P3_Tl      | Lung tumor       | LUAD      | Male   | 55  | Smoking        |
| P4_Tb      | Brain metastasis | LUAD      | Female | 53  | No smoking     |
| P4_Tl      | Lung tumor       | LUAD      | Female | 53  | No smoking     |
| P5_Tb      | Brain metastasis | LUAD      | Male   | 51  | No smoking     |
| P5_Tl      | Lung tumor       | LUAD      | Male   | 51  | No smoking     |
| P6_Tb      | Brain metastasis | LUAD      | Female | 49  | No smoking     |
| P6_Tl      | Lung tumor       | LUAD      | Female | 49  | No smoking     |
| P7_Tb      | Brain metastasis | LUAD      | Female | 49  | No smoking     |
| P7_Tl      | Lung tumor       | LUAD      | Female | 49  | No smoking     |
| P8_Tb      | Brain metastasis | LUAD      | Male   | 30  | No smoking     |
| P8_Tl      | Lung tumor       | LUAD      | Male   | 30  | No smoking     |
| P9_Tb      | Brain metastasis | LUAD      | Male   | 51  | No smoking     |
| P9_Tl      | Lung tumor       | LUAD      | Male   | 51  | No smoking     |
| P10_Tb     | Brain metastasis | LUAD      | Female | 46  | No smoking     |
| P10_Tl     | Lung tumor       | LUAD      | Female | 46  | No smoking     |
| P11_Tb     | Brain metastasis | LUSC      | Male   | 47  | Smoking        |
| P11_Tl     | Lung tumor       | LUSC      | Male   | 47  | Smoking        |
| P12_Tb     | Brain metastasis | LUAD      | Female | 61  | No smoking     |
| P12_Tl     | Lung tumor       | LUAD      | Female | 61  | No smoking     |
| P13_Tb     | Brain metastasis | LUAD      | Female | 53  | No smoking     |
| P13_Tl     | Lung tumor       | LUAD      | Female | 53  | No smoking     |
| P14_Tb     | Brain metastasis | LUAD      | Male   | 58  | Smoking        |
| P14_Tl     | Lung tumor       | LUAD      | Male   | 58  | Smoking        |
| 001A_T1    | Lung tumor       | LUAD      | Female | 52  | No smoking     |
| 001A_T2    | Brain metastasis | LUAD      | Female | 52  | No smoking     |
| 001C_T1    | Lung tumor       | LUAD      | Female | 60  | No smoking     |
| 001C_T2    | Brain metastasis | LUAD      | Female | 60  | No smoking     |
| 001E_T1    | Lung tumor       | LUAD      | Female | 46  | No smoking     |
| 001E_T2    | Brain metastasis | LUAD      | Female | 46  | No smoking     |
| 001F_T1    | Lung tumor       | LUAD      | Male   | 60  | Smoking        |
| 001F_T2    | Brain metastasis | LUAD      | Male   | 60  | Smoking        |
| 001G_T1    | Lung tumor       | LUAD      | Female | 79  | No smoking     |
| 001G_T2    | Brain metastasis | LUAD      | Female | 79  | No smoking     |
| 001H_T1    | Lung tumor       | LUAD      | Male   | 70  | Smoking        |
| 001H_T2    | Brain metastasis | LUAD      | Male   | 70  | Smoking        |

|          |                  |          |        |    |            |
|----------|------------------|----------|--------|----|------------|
| 001I_T1  | Lung tumor       | CCA+LUAD | Male   | 61 | Smoking    |
| 001I_T2  | Brain metastasis | CCA+LUAD | Male   | 61 | Smoking    |
| 001J_T1  | Lung tumor       | LASC     | Female | 42 | No smoking |
| 001J_T2  | Brain metastasis | LASC     | Female | 42 | No smoking |
| 001K_T1  | Lung tumor       | LUAD     | Male   | 54 | Smoking    |
| 001K_T2  | Brain metastasis | LUAD     | Male   | 54 | Smoking    |
| 001M_T1  | Lung tumor       | LUSC     | Male   | 74 | Smoking    |
| 001M_T2  | Brain metastasis | LUSC     | Male   | 74 | Smoking    |
| 001O_T1  | Lung tumor       | LUAD     | Male   | 57 | No smoking |
| 001O_T2  | Brain metastasis | LUAD     | Male   | 57 | No smoking |
| S001B_T1 | Lung tumor       | LCLC     | Female | 57 | No smoking |
| S001B_T2 | Brain metastasis | LCLC     | Female | 57 | No smoking |
| S001L_T1 | Lung tumor       | LASC     | Male   | 57 | Smoking    |
| S001L_T2 | Brain metastasis | LASC     | Male   | 57 | Smoking    |

---
